# Supplementary material
Source: PubMed Central journal article supplement (PMC3014372)
Supplement: mmc1.pdf [file mmc1.pdf]

Supplemental Data

**SMOC1 Is Essential for Ocular and Limb Development**

**in Humans and Mice**

Ippei Okada, Haruka Hamanoue, Koji Terada, Takaya Tohma, Andre Megarbane, Eliane Chouery, Joelle Abou Ghoch, Nadine Jalkh, Ozgur Cogulu, Ferda Ozkinay, Kyoji Horie, Junji Takeda, Tatsuya Furuichi, Shiro Ikegawa, Kiyomi Nishiyama, Satoko Miyatake, Akira Nishimura, Takeshi Mizuguchi, Norio Niikawa, Fumiki Hirahara, Tadashi Kaname, Koh-ichiro Yoshiura, Yoshinori Tsurusaki, Hiroshi Doi, Noriko Miyake, Takahisa Furukawa, Naomichi Matsumoto, and Hirotomo Saitu

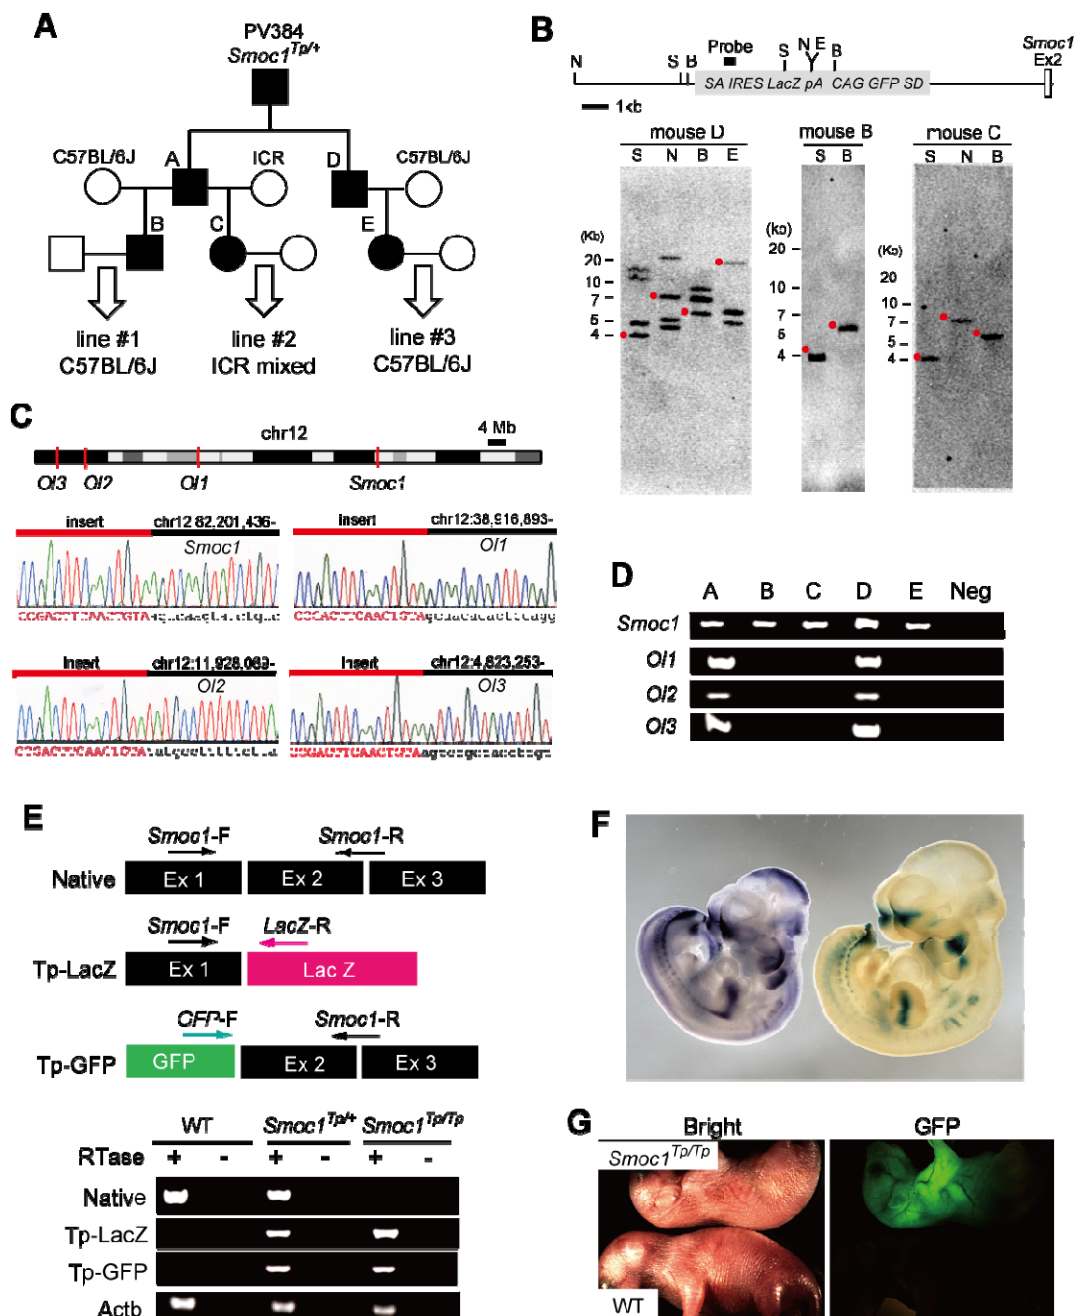

## Figure S1. Characterization of PV384 (*Smoc1* Mutant) Mice

(A) Schematic representation of PV384 mouse lines. Mice heterozygous for a *Smoc1* gene-trap insertion are indicated by filled symbols. (B) Southern hybridization analysis of PV384 mice. (Top) A partial restriction map (N, *Nde*I; S, *Sac*I; Bg, *Bgl*II; E, *Eco*RI) and the position of the probe for Southern hybridization are indicated. SA, splice acceptor; IRES, internal ribosome entry site; pA, poly(A); GFP, green fluorescent protein; SD, splice donor. (Bottom) Southern hybridization of the probe on the genomic DNA of mice D, B and C. While mouse D showed three to four bands, mice B and C showed only one band corresponding to the DNA fragment containing the *Smoc1* locus (red dots). (C) Identification of the other three loci containing gene-trap insertions (*O11* to *O13*). Mouse chromosome 12 ideogram and the four loci are indicated with red bars (top). Electropherogram of flanking genomic sequences are shown (bottom). (D) PCR genotyping to detect gene-trap insertions at four different loci. Note that the three lines (#1 to #3) were derived from mice (B, C and E) which had a single insertion at the *Smoc1* locus. Neg, no template PCR. (E) Confirmation by RT-PCR of native *Smoc1*, promoter-trapped (Tp-LacZ) and poly(A)-trapped (Tp-GFP) transcripts. The native *Smoc1* transcript was detected in WT and *Smoc1*<sup>Tp/+</sup> embryos, but was undetected in *Smoc1*<sup>Tp/Tp</sup> embryos, indicating that *Smoc1*<sup>Tp/Tp</sup> is null for *Smoc1*. Promoter-trapped and poly(A)-trapped transcripts were detected in both *Smoc1*<sup>Tp/+</sup> and *Smoc1*<sup>Tp/Tp</sup> mice.  $\beta$ -actin (*Actb*) was used as an internal control. (F) LacZ staining of heterozygous embryos (right) shows a similar pattern to that of *Smoc1* expression (left) in the limbs, optic nerve, pharyngeal arches and somites.  $\beta$ -galactosidase activity in whole embryos was detected as previously described (Hogan, B.L., Bedington, R., Constantini, F. & Lacy, E. *Manipulating the Mouse Embryo: A Laboratory Manual*, 2nd edn., (Cold Spring Harbor Laboratory Press, New York, 1994). (G) Comparable bright-field and fluorescence photographs of GFP-positive (top, *Smoc1*<sup>Tp/Tp</sup>) and GFP-negative (bottom, WT) newborns

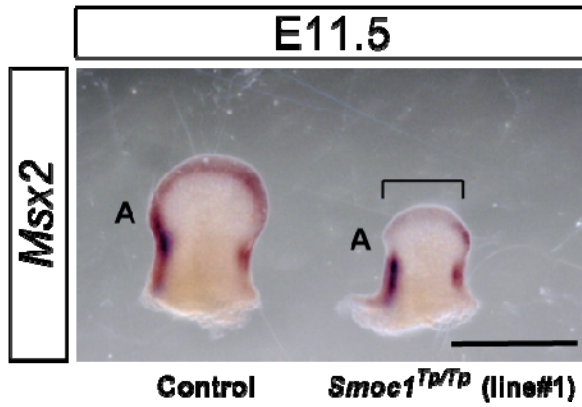

**Figure S2. Reduced Expression of *Msx2* in Hindlimbs of *Smoc1* Mutant Mice**

Whole mount *in situ* hybridization at E11.5. Dorsal view of the right hindlimbs is presented. Anterior side is indicated by A. Expression of *Msx2* was reduced in progressive zone of hindlimbs of *Smoc1*<sup>Tp/Tp</sup> mice (bracket). Scale bar, 1 mm.

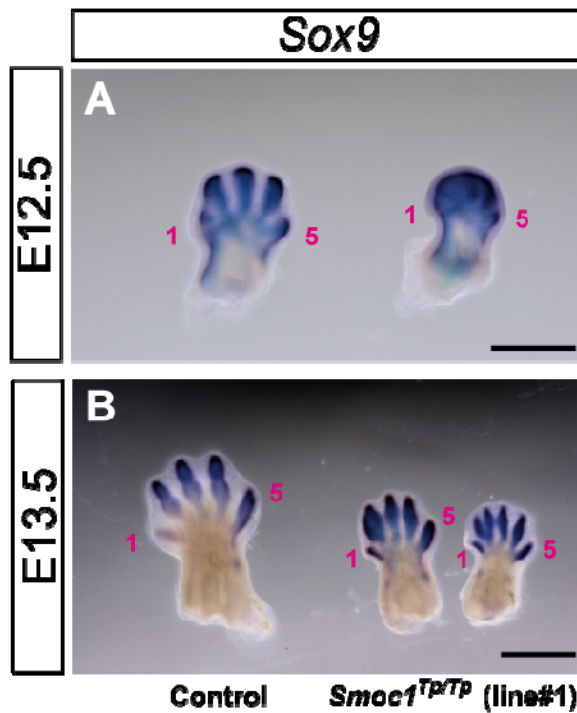

**Figure S3. Delayed and Altered Expression of *Sox9* in Hindlimbs of *Smoc1* Mutant Mice**

Whole mount *in situ* hybridization of right hindlimbs at E12.5 (A) and E13.5 (B). Future digit identities are indicated by numbers 1 (thumb, anterior) and 5 (little finger, posterior). (A) Expression of *Sox9* at E12.5 was delayed in hindlimbs of *Smoc1<sup>Tp/Tp</sup>* mice compared with that of control mice, suggesting a delay of limb development. (B) Compared with control mice (left), expression of *Sox9* in hindlimbs of *Smoc1<sup>Tp/Tp</sup>* mice at E13.5 showed abnormally thick cartilage condensation in future digit 2 (middle) or extra numbers of cartilage condensation (right), suggesting limb patterning defects. Scale bar, 1 mm.

**Table S1. Phenotypes of *SMOCl/Smoc1* Mutations in Humans and Mice**

|                                         | A-II-2                 | A-II-3                 | C-II-3               | X-II-1                 | <i>Smoc1</i> <sup>Tp/Tp</sup> mice |
|-----------------------------------------|------------------------|------------------------|----------------------|------------------------|------------------------------------|
| <b>origin</b>                           | Okinawa, Japan         | Okinawa, Japan         | Lebanon              | Turkey                 |                                    |
| <b>consanguinity</b>                    | –                      | –                      | +                    | +                      |                                    |
| <b>sex</b>                              | male                   | female                 | male                 | female                 |                                    |
| <b>ocular abnormality</b>               | +                      | +                      | +                    | +                      | +                                  |
| anophthalmia                            | bilateral              | bilateral              | bilateral            | bilateral              | small eye                          |
| loss of optic nerve (CT)                | bilateral              | bilateral              | bilateral            | nc                     | +                                  |
| loss of optic tract (CT)                | +                      | +                      | –                    | nc                     | (aplasia/hypoplasia)               |
|                                         |                        |                        |                      |                        | ND                                 |
| <b>upper limb abnormality</b>           | +                      | +                      | +                    | + <sup>a</sup>         | +                                  |
| syndactyly                              | –                      | –                      | –                    | +                      | +                                  |
| metacarpal synostosis                   | 4th and 5th fingers    | 4th and 5th fingers    | –                    | 4th and 5th fingers    | –                                  |
| hypoplasia                              | –                      | –                      | –                    | 5th finger             | –                                  |
| coalition of capitate and hamate        | –                      | –                      | –                    | +                      | –                                  |
| clinodactyly                            | +                      | –                      | +                    | +                      | –                                  |
| camptodactyly                           | +                      | –                      | +                    | –                      | –                                  |
| simian crease                           | +                      | +                      | –                    | +                      | ND                                 |
| <b>lower limb abnormality</b>           | +                      | +                      | +                    | + <sup>b</sup>         | +                                  |
| oligodactyly / syndactyly / polydactyly | bilateral oligodactyly | bilateral oligodactyly | bilateral syndactyly | bilateral oligodactyly | syndactyly                         |
| metatarsal synostosis                   | +                      | +                      | –                    | –                      | +                                  |
| bowed tibia                             | +                      | +                      | –                    | –                      | +                                  |
| hypoplastic fibula                      | +                      | +                      | –                    | +                      | +                                  |
| abnormal cleavage between toes          | 1st and 2nd toes       | 1st and 2nd toes       | 1st and 2nd toes     | –                      | –                                  |
| dermal syndactyly                       | 2nd and 3rd toes       | 2nd and 3rd toes       | 2nd to 5th toes      | –                      | +                                  |
| pes valgus                              | +                      | –                      | –                    | –                      | +                                  |
| <b>other</b>                            |                        |                        |                      |                        |                                    |
| congenital malformation of palate       | –                      | –                      | –                    | +                      | +                                  |
| failure to thrive                       | +                      | +                      | +                    | +                      | (cleft palate, in line#2)          |
| developmental retardation               | DQ=10                  | DQ=15                  | +                    | –                      | +                                  |
| cryptorchidism                          | right                  |                        | nc                   |                        | (growth retardation)               |
| sacral dimple                           | nc                     | nc                     | nc                   | +                      | ND                                 |
| <b><i>SMOCl</i> mutation</b>            | <b>c.718C&gt;T</b>     | <b>c.718C&gt;T</b>     | <b>c.664+1G&gt;A</b> | <b>c.378+1G&gt;A</b>   | <b>gene trapping</b>               |

CT, computed tomography; DQ, developmental quotient

nc, not confirmed ND, not determined

a, 5th metacarpal in the left hand is absent

b, distal phalanges of the 4th toe on both feet are absent

**Table S2. Marker Primers for Chromosome 14 Mapping**

| <b>Marker</b>        | <b>Forward (5' &gt; 3')</b> | <b>Reverse (5' &gt;3')</b> | <b>Fluorescence</b> | <b>Product size (bp)</b> |
|----------------------|-----------------------------|----------------------------|---------------------|--------------------------|
| <i>D14S70</i>        | ATCAATTTGCTAGTTTGGCA        | AGCTAATGACTTAGACACGTTGT    | VIC                 | 214                      |
| <i>D14S288</i>       | AGCTAGACTCTGCCATAAACA       | TGGAGACAGGAACAACACAC       | NED                 | 203                      |
| <i>D14S276</i>       | TGCTTTACCAAGTGCATCAC        | AGCTCAGAATCTAGGCCCT        | NED                 | 90                       |
| <i>Ch14-STS1</i>     | GCCCTGGAGCATCTTGTAGT        | GTTTCAGGTTTGGCCATGAG       | FAM                 | 162                      |
| <i>D14S63</i>        | GGCCAGGTTTCAATCAGTTT        | GCCAGAGAGCCCACTGTAT        | VIC                 | 205                      |
| <i>AFMA346YG1</i>    | AAGAGACTGACATAGCCAGTT       | CCGAGATACAAACATGGA         | NED                 | 112                      |
| <i>Ch14-STS2</i>     | TTTTCATATTTTTGAGAGTTTTAGG   | GCTGGCGAAAAGACAAGATT       | NED                 | 288                      |
| <i>AFM114YH10</i>    | TGTTCTAGTTGATGTGAGACTT      | TATTTGAGGACCTGCTGTAA       | FAM                 | 216                      |
| <i>AFMA064ZH5</i>    | TGGATTGTTTGCTCTCAGAT        | TAATGTCACTGCCTGGGA         | FAM                 | 261                      |
| <i>AFMB315YF5</i>    | CTGGGCAGTGACTCTAGGAGAC      | GGGAATACAGTGTCCAATGACC     | VIC                 | 196                      |
| <i>Ch14-STS3</i>     | TGCTTCAAACCTTGCCTCTT        | CCCTGCTTTGTCACCTCTTC       | VIC                 | 243                      |
| <i>CHLC.GGAA4A12</i> | GCCGAAAGAAAGAAAAAAGG        | CGAATGCATACTTGCTGTTG       | VIC                 | 120                      |
| <i>D14S258</i>       | TCACTGCATCTGGAAGCAC         | CTAACTAAATGGCGAGCATTGAG    | FAM                 | 176                      |
| <i>AFMA336YC5</i>    | AGATTTTGGATGTATCAGGC        | CAGAAGCAATAGGATGGATG       | NED                 | 168                      |
| <i>Ch14-STS5</i>     | TTATGCAACCATAGCCTTTGC       | GAGGTTGAGCAAGACCCTGT       | NED                 | 201                      |
| <i>Ch14-STS6</i>     | CCCACATCCAACACTGAGAA        | CCTTCCCTCTGTGTCCTCAC       | VIC                 | 215                      |
| <i>Ch14-STS7</i>     | CTCCCTTGATGTGTGAAGCA        | TTTTCAACACCACCACCAGA       | NED                 | 218                      |
| <i>AFM295ZD5</i>     | TTGCTTTCACTCCCATT           | TGCACTTGAAGATTCAGATAAGG    | FAM                 | 152                      |
| <i>Ch14-STS4</i>     | GGCCAACATGATGAAACCC         | AAGGCTCAGCAAGAAGAACTC      | FAM                 | 355                      |
| <i>AFM184XA5</i>     | GACTGAGGCTCAAGGATTGC        | CTTCCACTAATGGCGAGGAA       | VIC                 | 250                      |
| <i>D14S74</i>        | CCTGTACCACTACCTGAGTTGAGT    | CTTTGGCTGCCCGAAA           | VIC                 | 304                      |

**Table S3. Common Candidate Regions in Any Three of the Four Families**

| Chr | Physical position   | size      | SNP numbers | LOD scores |        |        |        |              |            |
|-----|---------------------|-----------|-------------|------------|--------|--------|--------|--------------|------------|
|     |                     |           |             | A          | B      | C      | X      | All families | 3 families |
| 5   | 44228425-45740067   | 1,511,643 | 17          | 0.852      | 1.164  | -2.935 | 1.453  | 0.534        | 3.469      |
| 5   | 57974102-58367038   | 392,937   | 19          | 0.852      | 1.075  | -0.474 | 1.453  | 2.907        | 3.380      |
| 5   | 61832737-62244988   | 412,252   | 13          | 0.852      | 1.150  | -0.478 | 1.453  | 2.978        | 3.455      |
| 6   | 8431193-8722149     | 290,957   | 21          | 0.977      | 1.041  | 1.683  | -0.847 | 2.854        | 3.701      |
| 6   | 25928376-27047713   | 1,119,338 | 10          | 0.977      | 1.176  | 1.790  | -0.845 | 3.098        | 3.943      |
| 6   | 33478496-34613887   | 1,135,392 | 12          | 0.977      | 0.929  | 1.582  | -0.843 | 2.645        | 3.488      |
| 6   | 123015089-123893054 | 877,966   | 17          | 0.977      | 1.177  | -1.714 | 1.414  | 1.854        | 3.568      |
| 7   | 9174771-9431031     | 256,261   | 18          | 0.977      | 1.174  | 1.804  | -6.996 | -3.041       | 3.955      |
| 7   | 14738170-14997102   | 258,933   | 13          | 0.977      | 0.947  | 1.698  | -0.845 | 2.776        | 3.621      |
| 10  | 16851432-17381572   | 530,141   | 18          | 0.977      | 1.183  | -6.438 | 1.454  | -2.825       | 3.613      |
| 10  | 17704372-24780906   | 7,076,535 | 151         | 0.977      | 1.183  | -27.00 | 1.454  | -23.40       | 3.613      |
| 10  | 28006811-28197289   | 190,479   | 6           | 0.977      | 1.183  | Inf    | 1.454  | Inf          | 3.613      |
| 10  | 28305685-28541472   | 235,788   | 14          | 0.977      | 1.183  | 1.829  | 1.454  | 5.442        |            |
| 10  | 28633450-29361379   | 727,930   | 56          | 0.977      | 1.183  | 1.829  | -3.742 | 0.247        | 3.988      |
| 11  | 48058313-48987539   | 929,227   | 6           | -8.150     | 1.103  | 1.828  | 1.343  | -3.876       | 4.275      |
| 12  | 43151728-43514937   | 363,210   | 22          | -4.025     | 1.183  | 1.626  | 1.162  | -0.054       | 3.971      |
| 14  | 68275342-71054478   | 2,779,137 | 63          | 0.977      | -2.713 | 1.828  | 1.131  | 1.223        | 3.936      |
| 14  | 71220216-71295001   | 74,786    | 2           | 0.977      | 0.437  | 1.828  | 0.015  | 3.257        |            |
| 14  | 71412340-71658253   | 245,914   | 6           | 0.977      | 0.437  | 1.828  | -6.865 | -3.623       | 3.243      |
| 15  | 58696863-58853363   | 156,501   | 10          | Inf        | 0.817  | 1.798  | 1.450  | Inf          | 4.065      |

Gray highlighted: previous candidate region on 10p12.33-p11.23 (Hamanoue, H. et al., Am J Med Genet A, 2009)

Green highlighted: the region analyzed in this study

**Table S4. Analysis of the Splice Site Predictions of the Two Mutations**

|                      |            | ESEfinder3.0<br>(score)    | NetGene2<br>(confidence) | HSF 2.4.1 <sup>a</sup><br>(value) | SpliceView<br>(score)   | BDGP <sup>a</sup> (score) |
|----------------------|------------|----------------------------|--------------------------|-----------------------------------|-------------------------|---------------------------|
| <b>c.378+1G&gt;A</b> | reference  | 11.9514                    | 0.67                     | 96.91                             | 92                      | 0.99                      |
|                      | mutation   | <6.67<br>(under threshold) | under threshold          | 70.07                             | under threshold         | <0.40<br>(under cutoff)   |
|                      | assessment | <b><i>abolished</i></b>    | <b><i>abolished</i></b>  | <b><i>site broken</i></b>         | <b><i>abolished</i></b> | <b><i>abolished</i></b>   |
| <b>c.664+1G&gt;A</b> | reference  | 9.8861                     | 0.75                     | 87.83                             | 81                      | 1.00                      |
|                      | mutation   | <6.67<br>(under threshold) | under threshold          | 61                                | under threshold         | <0.40<br>(under cutoff)   |
|                      | assessment | <b><i>abolished</i></b>    | <b><i>abolished</i></b>  | <b><i>site broken</i></b>         | <b><i>abolished</i></b> | <b><i>abolished</i></b>   |

<sup>a</sup>Human Splicing Finder Version 2.4.1<sup>b</sup>Berkeley Drosophila Genome Project
